# Supplementary material
Source: Springer Nature journal article supplement (https://www.springermedizin.de/resource/supplementary/12985_2013_2486_MOESM9_ESM.pdf/9606832)

**Merged****DAPI****SIV probe**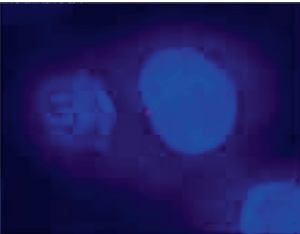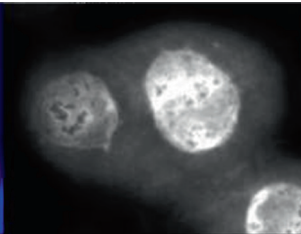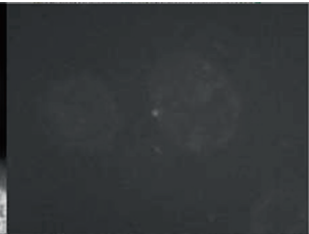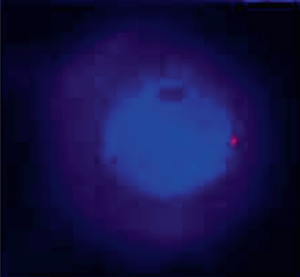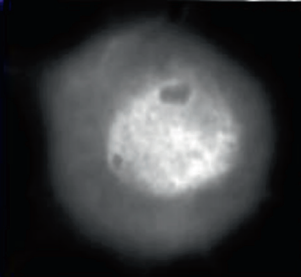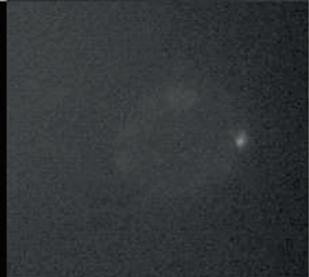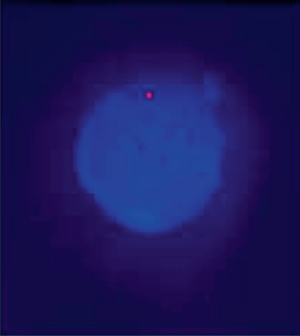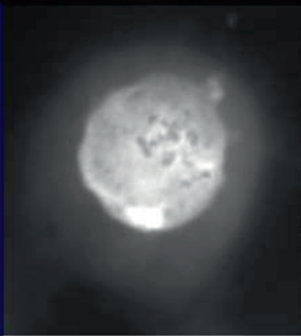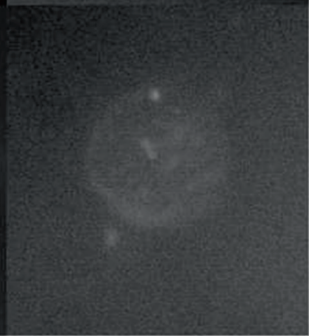

Supplement: MOESM9 [file 9606832]
